# Supplementary material for: Simulation of calcium signaling in fine astrocytic processes: Effect of spatial properties on spontaneous activity
Source: PubMed Central journal article supplement (PMC6726244; doi:10.1371/journal.pcbi.1006795), 2019-08-19

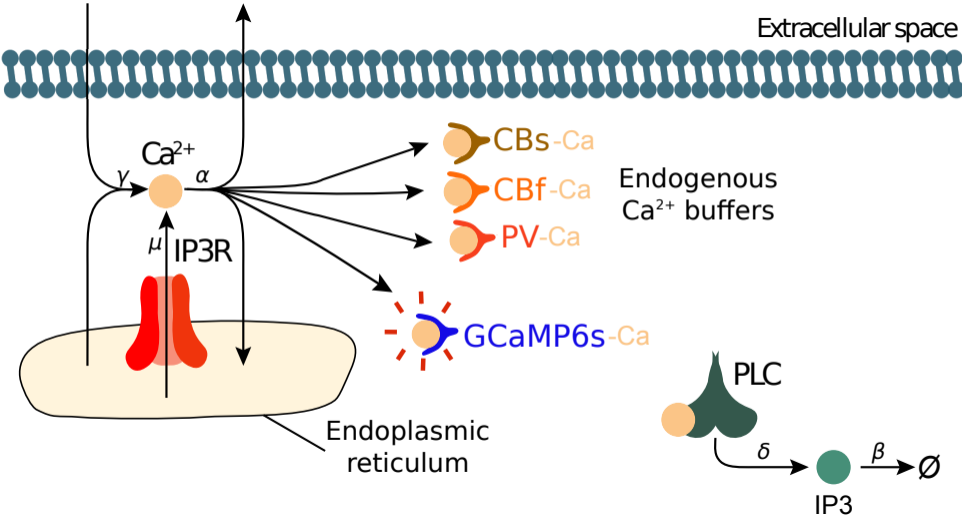

Supplement: pcbi.1006795.s002.pdf [file pcbi.1006795.s002.pdf]
