# Supplementary material for: Simulation of calcium signaling in fine astrocytic processes: Effect of spatial properties on spontaneous activity
Source: PubMed Central journal article supplement (PMC6726244; doi:10.1371/journal.pcbi.1006795), 2019-08-19
Supplement: pcbi.1006795.s003.pdf [file pcbi.1006795.s003.pdf]

| Parameter    | Description               | Value in 3d                                     | Reference |
|--------------|---------------------------|-------------------------------------------------|-----------|
| $C_{PV}$     | Initial PV conc.          | 260 nM                                          | [125]     |
| $C_{PV}$     | Initial Ca-PV conc.       | 400 nM                                          | [125]     |
| $D_{PV}$     | PV diffusion              | $43 \mu\text{m}^2.\text{s}^{-1}$                | [125]     |
| $PV_f$       | PV Ca binding rate        | $10.7 \times 10^7 \text{ M}^{-1}.\text{s}^{-1}$ | [125]     |
| $PV_b$       | PV-Ca dissociation rate   | $0.95 \text{ s}^{-1}$                           | [125]     |
| $C_{CBs}$    | Initial CBs conc.         | 110 nM                                          | [125]     |
| $C_{CBsCa}$  | Initial CBsCa conc.       | 200 nM                                          | [125]     |
| $C_{CBsCa2}$ | Initial CBsCa2 conc.      | 200 nM                                          | [125]     |
| $D_{CBs}$    | CBs diffusion             | $28 \mu\text{m}^2.\text{s}^{-1}$                | [125]     |
| $CBs_f$      | CBs Ca binding rate       | $5.5 \times 10^6 \text{ M}^{-1}.\text{s}^{-1}$  | [125]     |
| $CBs_b$      | CBs-Ca dissociation rate  | $2.6 \text{ s}^{-1}$                            | [125]     |
| $CBsCa_f$    | CBs-Ca Ca binding rate    | $5.5 \times 10^6 \text{ M}^{-1}.\text{s}^{-1}$  | [125]     |
| $CBsCa_b$    | CBs-Ca2 dissociation rate | $2.6 \text{ s}^{-1}$                            | [125]     |
| $C_{CBf}$    | Initial CBf conc.         | 110 nM                                          | [125]     |
| $C_{CBfCa}$  | Initial CBfCa conc.       | 200 nM                                          | [125]     |
| $C_{CBfCa2}$ | Initial CBfCa2 conc.      | 200 nM                                          | [125]     |
| $D_{CBf}$    | CBf diffusion             | $28 \mu\text{m}^2.\text{s}^{-1}$                | [125]     |
| $CBf_f$      | CBf Ca binding rate       | $4.35 \times 10^7 \text{ M}^{-1}.\text{s}^{-1}$ | [125]     |
| $CBf_b$      | CBf-Ca dissociation rate  | $35.8 \text{ s}^{-1}$                           | [125]     |
| $CBfCa_f$    | CBf-Ca Ca binding rate    | $4.35 \times 10^7 \text{ M}^{-1}.\text{s}^{-1}$ | [125]     |
| $CBfCa_b$    | CBf-Ca2 dissociation rate | $35.8 \text{ s}^{-1}$                           | [125]     |
